# Supplementary material for: Micro-utrophin Improves Cardiac and Skeletal Muscle Function of Severely Affected D2/mdx Mice
Source: PubMed Central journal article supplement (PMC6216100; doi:10.1016/j.omtm.2018.10.005), 2018-10-16
Supplement: mmc1.pdf [file mmc1.pdf]

**OMTM, Volume 11**

**Supplemental Information**

**Micro-utrophin Improves Cardiac  
and Skeletal Muscle Function of Severely  
Affected D2/*mdx* Mice**

**Tahnee L. Kennedy, Simon Guiraud, Ben Edwards, Sarah Squire, Lee Moir, Arran Babbs, Guy Odom, Diane Golebiowski, Joel Schneider, Jeffrey S. Chamberlain, and Kay E. Davies**

## Supplemental Figures

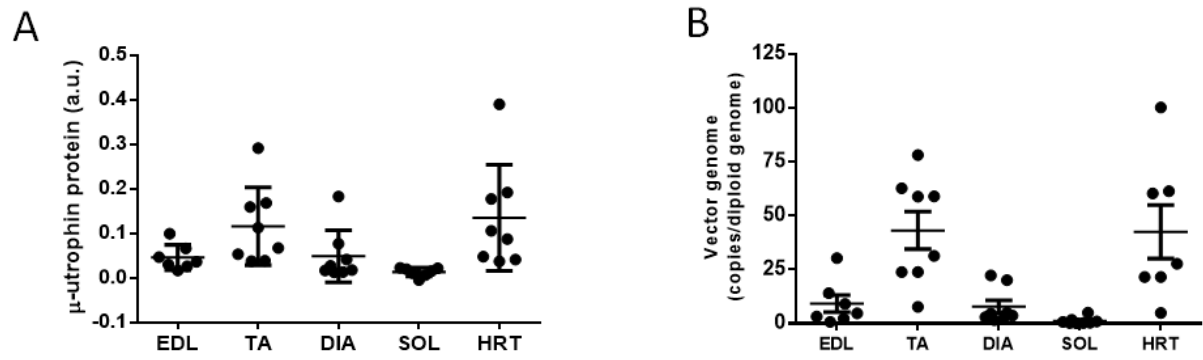

Supp. Figure 1.

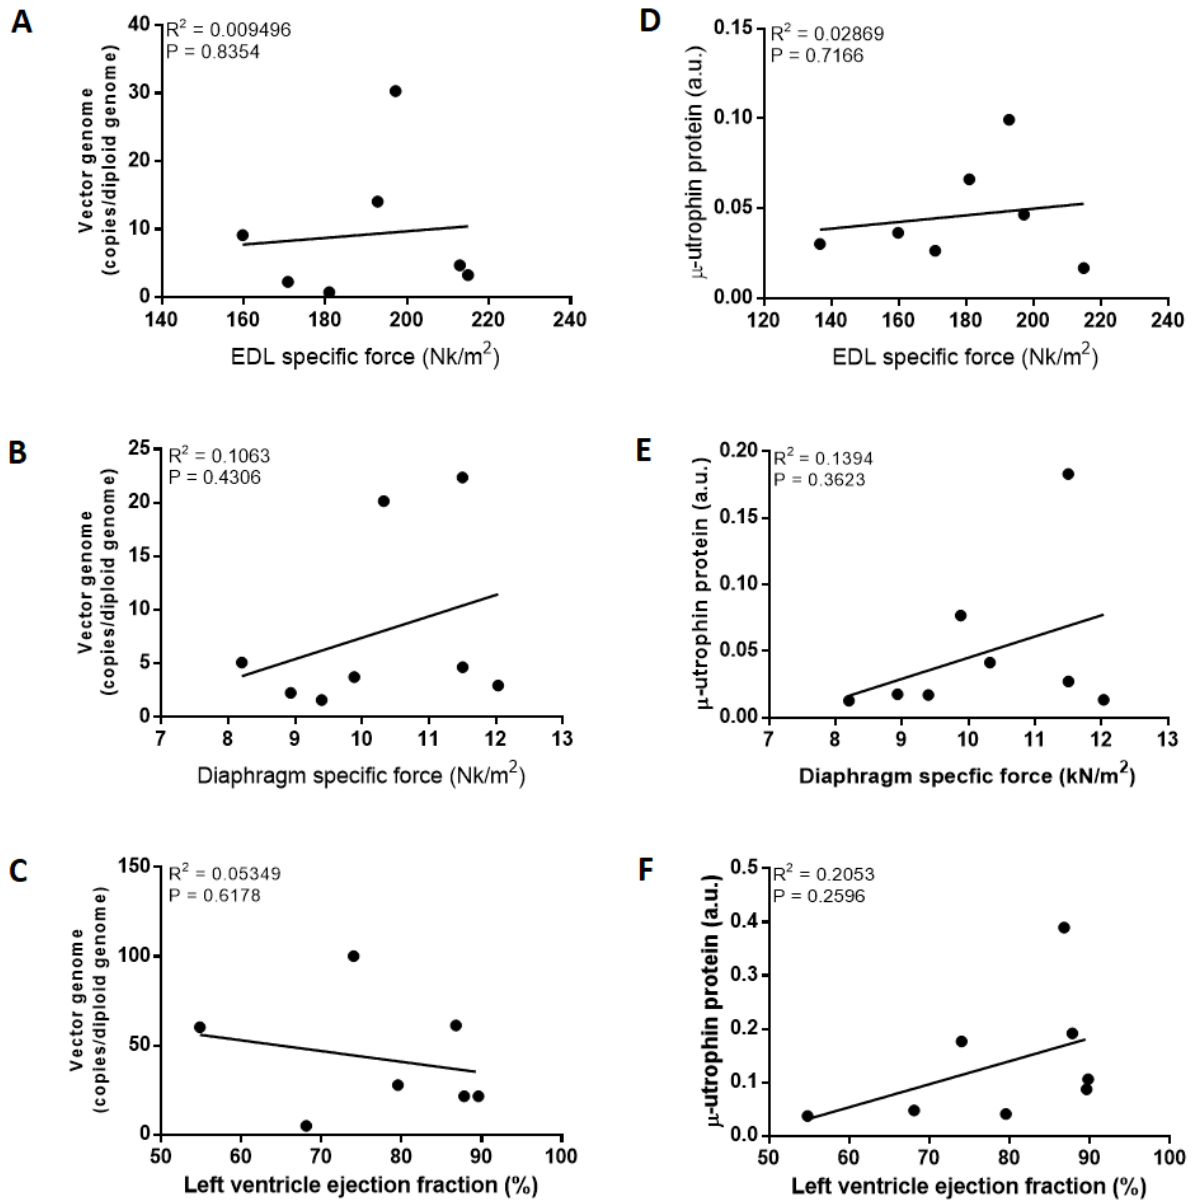

Supp. Figure 2.

## Supplemental Figure Legends

**Supp. Figure 1. Quantification of  $\mu$ -utrophin protein expression and vector genome copy number in cardiac and skeletal muscles of D2/*mdx* mice administered AAV- $\mu$ -Utro.** Quantification of (A)  $\mu$ -utrophin protein expression and (B) qPCR detection of the CMV promoter in cardiac and skeletal muscles from D2/*mdx* mice administered AAV- $\mu$ -Utro. Data represented as mean  $\pm$  SEM,  $n = 8$ /group. EDL, extensor digitorum longus; TA, tibialis anterior; DIA, diaphragm; SOL, soleus; HRT, heart.

**Supp. Figure 2. Assessment of the linear relationship between  $\mu$ -utrophin protein expression or vector genome expression and functional parameters of cardiac and skeletal muscles from D2/*mdx* mice administered AAV- $\mu$ -Utro.** Assessment of the linear relationship between  $\mu$ -utrophin protein expression and (A) specific force extensor digitorum longus (EDL) muscles, (B) specific force of diaphragm muscle strips and (C) left ventricle ejection fraction of D2/*mdx* mice administered AAV- $\mu$ -Utro. Assessment of the linear relationship between vector genome expression and (D) specific force of EDL muscles, (E) specific force of diaphragm muscle strips and (F) left ventricle ejection fraction of D2/*mdx* mice administered AAV- $\mu$ -Utro. No statistically significant correlations was observed between parameters.  $n = 8$ /group.

**Supplementary Table 1. Body mass, kyphosis score and muscle mass of 14-, 21- and 28-week BL10/WT, BL10/*mdx*, D2/WT and D2/*mdx* mice**

|                |      |            | 14 weeks    | 21 weeks  | 28 weeks    |
|----------------|------|------------|-------------|-----------|-------------|
| Body mass (g)  | BL10 | WT         | 28 ± 1      | 30 ± 1    | 33 ± 2      |
|                |      | <i>mdx</i> | 35 ± 1 *    | 34 ± 2    | 39 ± 1 *    |
|                | D2   | WT         | 28 ± 1      | 33 ± 1    | 31 ± 2      |
|                |      | <i>mdx</i> | 24 ± 1      | 27 ± 1 *  | 30 ± 2      |
| Kyphosis score | BL10 | WT         | 1 ± 0       | 1.1 ± 0.1 | 1 ± 0       |
|                |      | <i>mdx</i> | 1 ± 0       | 1.3 ± 0.2 | 2.1 ± 0.2 * |
|                | D2   | WT         | 1.7 ± 0.1   | 2.8 ± 0.2 | 3.4 ± 0.1   |
|                |      | <i>mdx</i> | 2.2 ± 0.2 * | 2.2 ± 0.1 | 3.2 ± 0.2   |

#### HEART

|                        |      |            |              |               |             |
|------------------------|------|------------|--------------|---------------|-------------|
| Heart mass (mg)        | BL10 | WT         | 189.6 ± 23.3 | 138.1 ± 2.8   | 146.8 ± 7.2 |
|                        |      | <i>mdx</i> | 227.1 ± 7.2  | 152.3 ± 3.2 * | 155.1 ± 3.0 |
|                        | D2   | WT         | 155.3 ± 18.6 | 155.9 ± 3.4   | 153.3 ± 4.9 |
|                        |      | <i>mdx</i> | 182.1 ± 13.5 | 153.0 ± 4.7   | 162.7 ± 8.1 |
| Heart/body mass (mg/g) | BL10 | WT         | 6.7 ± 0.7    | 4.7 ± 0.2     | 4.4 ± 0.2   |
|                        |      | <i>mdx</i> | 6.5 ± 0.3    | 4.3 ± 0.2     | 4.0 ± 0.1   |
|                        | D2   | WT         | 5.8 ± 0.9    | 4.6 ± 0.1     | 5.1 ± 0.3   |
|                        |      | <i>mdx</i> | 7.6 ± 0.2    | 5.8 ± 0.3 *   | 5.5 ± 0.2   |

#### SKELETAL MUSCLE

|                       |      |            |               |               |               |
|-----------------------|------|------------|---------------|---------------|---------------|
| TA/body mass (mg/g)   | BL10 | WT         | 1.57 ± 0.38   | 1.45 ± 0.05   | 1.30 ± 0.60   |
|                       |      | <i>mdx</i> | 2.20 ± 0.08 * | 2.29 ± 0.10 * | 2.17 ± 0.06 * |
|                       | D2   | WT         | 1.39 ± 0.90   | 1.13 ± 0.05   | 1.19 ± 0.07   |
|                       |      | <i>mdx</i> | 1.52 ± 0.14   | 1.31 ± 0.09   | 1.19 ± 0.08   |
| EDL/body mass (mg/g)  | BL10 | WT         | 0.27 ± 0.026  | 0.32 ± .01    | 0.30 ± 0.01   |
|                       |      | <i>mdx</i> | 0.45 ± 0.02 * | 0.47 ± 0.02 * | 0.45 ± 0.01 * |
|                       | D2   | WT         | 0.33 ± 0.06   | 0.26 ± 0.01   | 0.29 ± 0.01   |
|                       |      | <i>mdx</i> | 0.23 ± 0.26   | 0.31 ± 0.06   | 0.26 ± 0.03   |
| Quad/body mass (mg/g) | BL10 | WT         | 5.18 ± 0.73   | 6.19 ± 0.15   | 5.43 ± 0.51   |
|                       |      | <i>mdx</i> | 9.05 ± 0.31 * | 9.77 ± 0.27 * | 8.97 ± 0.21 * |
|                       | D2   | WT         | 5.12 ± 0.34   | 4.99 ± 0.32   | 5.58 ± 0.24   |
|                       |      | <i>mdx</i> | 4.29 ± 0.26   | 3.96 ± 0.14 * | 3.54 ± 0.22 * |

TA, tibialis anterior; EDL, extensor digitorum longus; Quad, quadriceps. Data represented as mean  $\pm$  SEM, \* $P < 0.05$  vs age-matched WT control,  $n = 6$ /group.

**Supplementary Table 2. Body mass, kyphosis score and muscle mass of 21-week-old D2/*mdx* mice administered AAV- $\mu$ -Utro compared to vehicle control mice.**

|                              | <b>Untreated</b>                  | <b>AAV-<math>\mu</math>-Utro</b>  |
|------------------------------|-----------------------------------|-----------------------------------|
| <b>Body mass (g)</b>         | <b>28 <math>\pm</math> 1</b>      | <b>26 <math>\pm</math> 1</b>      |
| Kyphosis score               | 2.5 $\pm$ 0.2                     | 2.3 $\pm$ 0.2                     |
| <b>HEART</b>                 |                                   |                                   |
| <b>Heart mass (mg)</b>       | <b>165.9 <math>\pm</math> 7.7</b> | <b>156.0 <math>\pm</math> 8.3</b> |
| Heart mass/body mass (mg/g)  | 6.0 $\pm$ 0.3                     | 6.0 $\pm$ 0.2                     |
| <b>SKELETAL MUSCLE</b>       |                                   |                                   |
| <b>TA/body mass (mg/g)</b>   | <b>2.0 <math>\pm</math> 0.1</b>   | <b>1.8 <math>\pm</math> 0.8</b>   |
| EDL/body mass (mg/g)         | 0.3 $\pm$ 0.0                     | 0.3 $\pm$ 0.0                     |
| <b>Quad/body mass (mg/g)</b> | <b>4.6 <math>\pm</math> 0.3</b>   | <b>6.2 <math>\pm</math> 0.3</b>   |
| Sol/body mass (mg/g)         | 0.6 $\pm$ 0.1                     | 0.3 $\pm$ 0.0                     |

Data represented as mean  $\pm$  SEM,  $n = 8$ /group. No statistical differences were observed between groups. Tibialis anterior, TA; extensor digitorum longus, EDL; quadriceps, Quad; soleus, Sol.
